# Supplementary material for: Preoperative Prediction of New Vertebral Fractures after Vertebral Augmentation with a Radiomics Nomogram
Source: MDPI journal article supplement (doi:10.3390/diagnostics13223459), 2023-11-16
Supplement: s1 [file s1]

## **Preoperative prediction of new vertebral fractures after vertebral augmentation with a radiomics nomogram**

Yang Jiang<sup>1†</sup>, Wei Zhang<sup>1†</sup>, Shihao Huang<sup>2</sup>, Qing Huang<sup>3</sup>, Haoyi Ye<sup>4</sup>, Yurong Zeng<sup>5</sup>, Xin Hua<sup>6</sup>, Jinhui Cai<sup>1</sup>, Zhifeng Liu<sup>4\*</sup>, Qingyu Liu<sup>1\*</sup>

<sup>1</sup>Department of Radiology, The Seventh Affiliated Hospital, Sun Yat-sen University, Shenzhen 518000, China; jiangy279@mail2.sysu.edu.cn (Y.J.); zhangwei3@sysush.com (W.Z.); caijinhui@sysush.com (J.C.)

<sup>2</sup>Department of Radiology, The Fifth Affiliated Hospital of Sun Yat-sen University, Zhuhai, China 519000; m15285361659@163.com (S.H.)

<sup>3</sup>Department of Endocrinology, The Seventh Affiliated Hospital, Sun Yat-sen University, Shenzhen 518000, China; huangq77@mail2.sysu.edu.cn (Q.H.)

<sup>4</sup>Department of Radiology, The Fourth Affiliated Hospital of Guangzhou Medical University, Guangzhou 510000, China; 2021689031@gzhmu.edu.cn (H.Y.)

<sup>5</sup>Department of Radiology, Huizhou Central People's Hospital, Huizhou 516000, China; zeng\_yurong@163.com (Y.Z.)

<sup>6</sup>Department of Neurology, The First Affiliated Hospital of Wenzhou Medical University, Wenzhou 325000, China; huaxin04157915@163.com (X.H.)

<sup>†</sup>These authors contributed equally to this work.

\* Correspondence: liuqingyu@sysush.com (Q.L.); 2021689182@gzhmu.edu.cn (Z.L.)

# 1 Supplementary Figures and Tables

## 1.1 Supplementary Figures

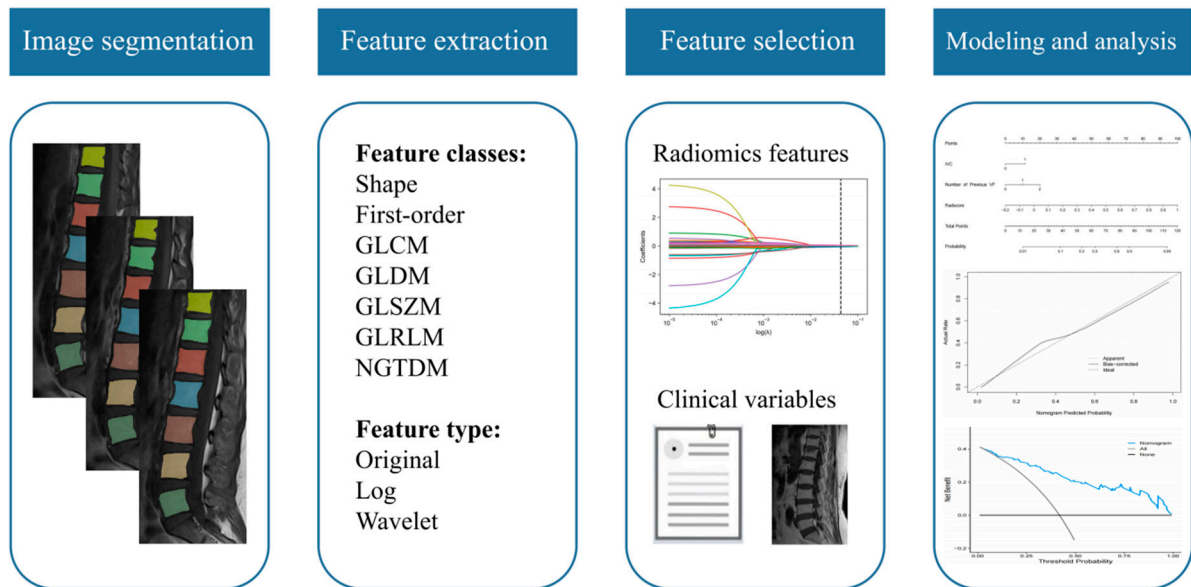

**Supplementary Figure S1.** The study flowchart and the workflow of radiomics.

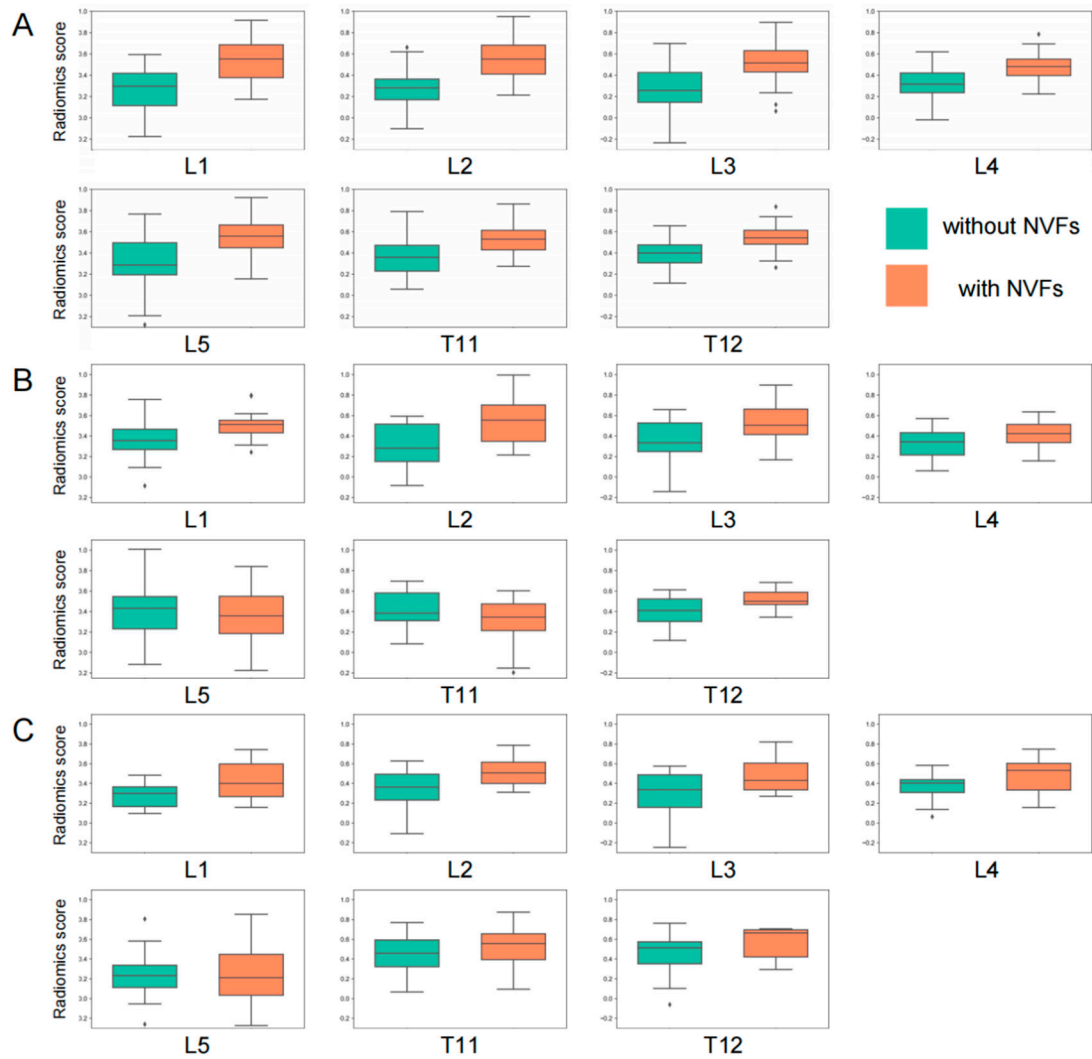

**Supplementary Figure S2.** The distribution for radiomics scores of each vertebra. (A)

training set, (B) internal validation set, (C) external validation set.

## 1.2 Supplementary Tables

**Supplementary Table S1.** Details of 1.5 Tesla T1-weighted MRI image acquisition parameters

| Parameters                    | Center 1       | Center 2          |
|-------------------------------|----------------|-------------------|
| Scanner                       | GE (Signa HDi) | Philips (Multiva) |
| Sequence                      | TSE            | TSE               |
| Repetition / echo time (msec) | 450/8.2        | 384/7.4           |
| Field of view (mm)            | 300            | 342               |
| Voxel size(mm)                | 0.9×1.3×4.0    | 0.9×1.3×4.0       |
| Bandwidth (Hz)                | 260            | 231.5             |
| Thickness(mm)                 | 4              | 4                 |
| Flip angle (degrees)          | 180            | 90                |

*Center 1*, The Fourth Affiliated Hospital of Guangzhou Medical University; *Center 2*, Huizhou Central People's Hospital.

**Supplementary Table S2.** Predictive performance of level-specific Radscore compared with clinical variables

| Variable                     | Training set |             |         | Internal validation set |             |         | External validation set |             |         |
|------------------------------|--------------|-------------|---------|-------------------------|-------------|---------|-------------------------|-------------|---------|
|                              | AUC          | 95%CI       | p-value | AUC                     | 95%CI       | p-value | AUC                     | 95%CI       | p-value |
| RadscoreT11                  | 0.792        | 0.714-0.857 | <0.001  | 0.657                   | 0.517-0.780 | 0.041   | 0.614                   | 0.445-0.765 | 0.279   |
| RadscoreT12                  | 0.823        | 0.736-0.891 | <0.001  | 0.740                   | 0.593-0.856 | 0.001   | 0.684                   | 0.478-0.848 | 0.186   |
| RadscoreL1                   | 0.831        | 0.740-0.901 | <0.001  | 0.749                   | 0.577-0.878 | 0.004   | 0.705                   | 0.481-0.875 | 0.129   |
| RadscoreL2                   | 0.850        | 0.773-0.909 | <0.001  | 0.783                   | 0.644-0.887 | <0.001  | 0.751                   | 0.587-0.876 | 0.002   |
| RadscoreL3                   | 0.825        | 0.746-0.888 | <0.001  | 0.749                   | 0.608-0.860 | <0.001  | 0.695                   | 0.520-0.837 | 0.065   |
| RadscoreL4                   | 0.814        | 0.733-0.879 | <0.001  | 0.686                   | 0.549-0.802 | 0.015   | 0.668                   | 0.506-0.806 | 0.108   |
| RadscoreL5                   | 0.794        | 0.717-0.857 | <0.001  | 0.574                   | 0.436-0.704 | 0.371   | 0.522                   | 0.365-0.677 | 0.845   |
| Age                          | 0.614        | 0.532-0.692 | 0.013   | 0.602                   | 0.474-0.721 | 0.144   | 0.643                   | 0.484-0.781 | 0.147   |
| Sex                          | 0.539        | 0.457-0.620 | 0.309   | 0.524                   | 0.397-0.648 | 0.694   | 0.546                   | 0.379-0.706 | 0.513   |
| Smoking                      | 0.521        | 0.439-0.602 | 0.519   | 0.524                   | 0.397-0.648 | 0.636   | 0.548                   | 0.391-0.699 | 0.427   |
| BMI                          | 0.533        | 0.451-0.614 | 0.486   | 0.514                   | 0.388-0.639 | 0.858   | 0.517                   | 0.362-0.670 | 0.859   |
| BMD                          | 0.558        | 0.476-0.638 | 0.223   | 0.575                   | 0.447-0.696 | 0.349   | 0.559                   | 0.401-0.708 | 0.527   |
| IVC                          | 0.618        | 0.536-0.695 | 0.001   | 0.610                   | 0.482-0.728 | 0.032   | 0.632                   | 0.474-0.772 | 0.050   |
| Surgical procedure           | 0.539        | 0.457-0.620 | 0.305   | 0.557                   | 0.429-0.679 | 0.354   | 0.522                   | 0.366-0.675 | 0.766   |
| Number of treated vertebra   | 0.504        | 0.422-0.585 | 0.913   | 0.594                   | 0.466-0.713 | 0.107   | 0.549                   | 0.382-0.709 | 0.432   |
| Location of treated vertebra | 0.570        | 0.488-0.650 | 0.073   | 0.548                   | 0.420-0.671 | 0.462   | 0.523                   | 0.357-0.685 | 0.770   |
| Number of previous VF        | 0.677        | 0.597-0.750 | <0.001  | 0.635                   | 0.507-0.750 | 0.045   | 0.620                   | 0.461-0.762 | 0.157   |

BMD, Bone Mineral Density; BMI, Body Mass Index; CI, confidence interval; IVC, intravertebral cleft; VF, vertebral fracture.

## 2 Supplementary Data

### 2.1 Supplementary Appendix S1

$$\begin{aligned}\text{RadscoreT11} = & -8.6174 + 8.9066 \times \text{original\_glcm\_Idmn} - \\ & 1.7716 \times \log\text{-sigma-3-0-mm-3D\_glszm\_SmallAreaLowGrayLevelEmphasis} + \\ & 0.0045 \times \log\text{-sigma-4-0-mm-3D\_firstorder\_Maximum} - \\ & 0.4613 \times \log\text{-sigma-4-0-mm-3D\_glrlm\_ShortRunLowGrayLevelEmphasis} + \\ & 0.0132 \times \log\text{-sigma-5-0-mm-3D\_glrlm\_ShortRunHighGrayLevelEmphasis} - \\ & 0.7246 \times \text{wavelet-LHH\_glszm\_SmallAreaLowGrayLevelEmphasis} + \\ & 0.0062 \times \text{wavelet-HLL\_glszm\_HighGrayLevelZoneEmphasis} + \\ & 0.0948 \times \text{wavelet-HLL\_gldm\_DependenceEntropy} + 0.8345 \times \text{wavelet-HHL\_firstorder\_Median} + \\ & 0.0738 \times \text{wavelet-HHH\_glcm\_SumEntropy} - \\ & 1.8472 \times \text{wavelet-HHH\_glrlm\_RunLengthNonUniformityNormalized} + \\ & 0.0009 \times \text{wavelet-HHH\_gldm\_LargeDependenceHighGrayLevelEmphasis}\end{aligned}$$

$$\begin{aligned}\text{RadscoreT12} = & -0.1503 + 8.8799 \times \text{original\_ngtdm\_Strength} - \\ & 0.8138 \times \log\text{-sigma-5-0-mm-3D\_glszm\_LowGrayLevelZoneEmphasis} + \\ & 92.7023 \times \log\text{-sigma-5-0-mm-3D\_glszm\_ZonePercentage} + \\ & 0.0037 \times \text{wavelet-LLH\_glszm\_GrayLevelNonUniformity} + \\ & 55.0641 \times \text{wavelet-LLH\_glszm\_ZonePercentage} - \\ & 0.0447 \times \text{wavelet-LHH\_glszm\_HighGrayLevelZoneEmphasis} + \\ & 7.4154e^{-8} \times \text{wavelet-LHH\_glszm\_LowGrayLevelZoneEmphasis} +\end{aligned}$$

$0.1486 \times \text{wavelet-LHH\_gldm\_DependenceEntropy} -$   
 $0.7662 \times \text{wavelet-HLL\_glszm\_SizeZoneNonUniformityNormalized} +$   
 $0.0145 \times \text{wavelet-HHL\_firstorder\_Kurtosis} -$   
 $0.3024 \times \text{wavelet-LLL\_glszm\_LowGrayLevelZoneEmphasis}$

**RadscoreL1** =  $0.2461 + 0.5674 \times \text{original\_glszm\_SmallAreaEmphasis} +$   
 $0.1498 \times \text{original\_glszm\_SmallAreaHighGrayLevelEmphasis} + 0.0005 \times \text{original\_ngtdm\_Busyness}$   
 $-29.6950 \times \text{original\_ngtdm\_Contrast} - 0.1479 \times \text{log-sigma-3-0-mm-3D\_firstorder\_Skewness} +$   
 $1.3256 \times \text{log-sigma-3-0-mm-3D\_glcm\_Imc1} + 0.0604 \times \text{log-sigma-4-0-mm-3D\_firstorder\_Kurtosis} +$   
 $0.0435 \times \text{log-sigma-5-0-mm-3D\_firstorder\_Kurtosis} +$   
 $0.0132 \times \text{wavelet-LLH\_glszm\_SizeZoneNonUniformityNormalized}$   
 $-0.0580 \times \text{wavelet-LLH\_glszm\_ZoneEntropy} - 4.4141 \times \text{wavelet-LHH\_glcm\_Imc1} -$   
 $0.8285 \times \text{wavelet-HLL\_glszm\_SmallAreaEmphasis} + 0.0196 \times \text{wavelet-HLH\_firstorder\_Kurtosis} -$   
 $0.0094 \times \text{wavelet-HLH\_firstorder\_Minimum}$

**RadscoreL2** =  $0.6859 + 0.0048 \times \text{original\_gldm\_DependenceVariance} +$   
 $0.0258 \times \text{log-sigma-3-0-mm-3D\_firstorder\_Kurtosis} -$   
 $0.0996 \times \text{log-sigma-3-0-mm-3D\_glcm\_ClusterShade} + 1.3215 \times \text{log-sigma-3-0-mm-3D\_glcm\_Imc1} +$   
 $0.0801 \times \text{log-sigma-3-0-mm-3D\_glrlm\_ShortRunHighGrayLevelEmphasis} -$   
 $0.1367 \times \text{log-sigma-3-0-mm-3D\_glszm\_SmallAreaLowGrayLevelEmphasis} +$   
 $0.4637 \times \text{wavelet-LHL\_glszm\_LowGrayLevelZoneEmphasis} -$   
 $0.0603 \times \text{wavelet-LHL\_glszm\_SmallAreaHighGrayLevelEmphasis} +$

0.0011×wavelet-HLL\_glrmlm\_LongRunHighGrayLevelEmphasis -

0.0446×wavelet-HLH\_glszm\_GrayLevelNonUniformity -

0.4579×wavelet-HHL\_glszm\_SmallAreaEmphasis -

0.0724×wavelet-HHL\_glszm\_SmallAreaLowGrayLevelEmphasis +

0.0768×wavelet-LLL\_firstorder\_Kurtosis + 0.5691×wavelet-LLL\_glcm\_Imc1

**RadscoreL3** = -1320.7777 + 0.7657×original\_glcm\_Imc1 +

6.9073e<sup>-9</sup>×original\_glszm\_LargeAreaHighGrayLevelEmphasis +

0.0671×log-sigma-4-0-mm-3D\_glszm\_ZoneEntropy -

0.1525×wavelet-LLH\_glszm\_SizeZoneNonUniformity +

0.0007×wavelet-LHL\_glrmlm\_LongRunHighGrayLevelEmphasis +

5.4800e<sup>-5</sup>×wavelet-LHL\_gldm\_LargeDependenceHighGrayLevelEmphasis +

0.0575×wavelet-LHH\_glszm\_ZoneEntropy + 0.7547×wavelet-HLL\_glcm\_Correlation +

0.0379×wavelet-HLL\_gldm\_DependenceVariance -

19.1784×wavelet-HHL\_gldm\_DependenceNonUniformityNormalized +

1323.7378×wavelet-HHH\_firstorder\_Entropy - 2.1655×wavelet-LLL\_glcm\_Imc2

**RadscoreL4** = 5.1828 + 0.0006×log-sigma-4-0-mm-3D\_ngtdm\_Busyness +

0.0481×wavelet-LHH\_glrmlm\_LongRunLowGrayLevelEmphasis -

0.0848×wavelet-LHH\_glszm\_SizeZoneNonUniformity -

0.3775×wavelet-HLH\_glcm\_MaximumProbability -

6.8592×wavelet-HLH\_glrmlm\_HighGrayLevelRunEmphasis -



$0.0267 \times \text{wavelet-HLH\_glrlm\_ShortRunHighGrayLevelEmphasis} +$   
 $0.0295 \times \text{wavelet-HHL\_glrlm\_LongRunHighGrayLevelEmphasis} -$   
 $0.0971 \times \text{wavelet-HHL\_glszm\_ZoneEntropy} + 4.9409 \times \text{wavelet-HHH\_gldm\_HighGrayLevelEmphasis}$   
 $- 0.0005 \times \text{wavelet-HHH\_gldm\_LowGrayLevelEmphasis} + 1.1897 \times \text{wavelet-LLL\_glcm\_Imc1}$

**RadscoreL5** =  $67.0056 + 0.3173 \times \text{wavelet-LLH\_glcm\_Imc1} -$   
 $0.7290 \times \text{wavelet-LLH\_glcm\_ClusterTendency} + 0.0309 \times \text{wavelet-LLH\_gldm\_DependenceVariance} +$   
 $0.0002 \times \text{wavelet-LLH\_gldm\_LargeDependenceEmphasis} +$   
 $0.0018 \times \text{wavelet-LLH\_gldm\_LargeDependenceHighGrayLevelEmphasis} +$   
 $18.1203 \times \text{wavelet-LHH\_glcm\_JointEnergy} + 4.9517 \times \text{wavelet-LHH\_glcm\_MaximumProbability} -$   
 $0.6968 \times \text{wavelet-HLL\_glszm\_LowGrayLevelZoneEmphasis} -$   
 $17.9769 \times \text{wavelet-HLH\_glcm\_MaximumProbability} -$   
 $5.7556 \times \text{wavelet-HHL\_glrlm\_HighGrayLevelRunEmphasis} +$   
 $0.0010 \times \text{wavelet-HHL\_glrlm\_LowGrayLevelRunEmphasis} - 54.7486 \times \text{wavelet-LLL\_glcm\_Idmn} -$   
 $0.1074 \times \text{wavelet-LLL\_glrlm\_RunEntropy}$
